# **Toward Broad Spectrum DHFR inhibitors Targeting Trimethoprim Resistant Enzymes Identified in Clinical Isolates of Methicillin-Resistant *Staphylococcus aureus***

Stephanie M. Reeve<sup>1</sup>, Debjani Si<sup>1</sup>, Jolanta Krucinska<sup>1</sup>, Yongzhao Yan<sup>1</sup>, Kishore Viswanathan<sup>1</sup>, Siyu Wang<sup>2,3</sup>, Graham T. Holt<sup>4</sup>, Marcel S. Frenkel<sup>4</sup>, Adegoke A. Ojewole<sup>2,3</sup>, Alexavier Estrada<sup>1</sup>, Sherry S. Agabiti<sup>1</sup>, Jeremy B. Alverson<sup>5</sup>, Nathan D. Gibson<sup>5</sup>, Nigel D. Priestly<sup>5</sup>, Andrew J. Wiemer<sup>1</sup>, Bruce R. Donald<sup>2,4,6</sup>, Dennis L. Wright<sup>1,7\*</sup>

<sup>1</sup>Department of Pharmaceutical Sciences, University of Connecticut, Storrs, CT 06269 USA

<sup>2</sup>Department of Computer Science, Duke University, Durham, NC 27708 USA

<sup>3</sup>Program in Computational Biology and Bioinformatics, Duke University, Durham, NC 27708 USA

<sup>4</sup>Department of Biochemistry, Duke University Medical Center, Durham, NC 27710 USA

<sup>5</sup>Department of Chemistry, University of Montana, Missoula, MT 59812, USA

<sup>6</sup>Department of Chemistry, Duke University, Durham, NC 27708 USA

<sup>7</sup>Department of Chemistry, University of Connecticut, Storrs, CT 06269 USA

\* Corresponding Author

## Abstract

The spread of plasmid borne resistance enzymes in clinical *Staphylococcus aureus* isolates is rendering trimethoprim and iclaprim, both inhibitors of dihydrofolate reductase (DHFR), ineffective. Continued exploitation of these targets will require compounds that can broadly inhibit these resistance-conferring isoforms. Using a structure-based approach, we have developed a novel class of ionized non-classical antifolates (INCAs) that capture the molecular interactions that have been exclusive to classical antifolates. These modifications allow for a greatly expanded spectrum of activity across these pathogenic DHFR isoforms, while maintaining the ability to penetrate the bacterial cell wall. Using biochemical, structural and computational methods, we are able to optimize these inhibitors to the conserved active sites of the endogenous and trimethoprim resistant DHFR enzymes. Here, we report a series of INCA compounds that exhibit low nanomolar enzymatic activity and potent cellular activity with human selectivity against a panel of clinically relevant TMP<sup>R</sup> MRSA isolates.

**Keywords:** Antifolate Resistance, Antibiotic Discovery, Iclaprim, Drug Discovery, Antibiotics, Ionized non-classical antifolates

1 Antibacterial resistance is a growing healthcare and public health crisis worldwide. The rapid  
2 dissemination of antibiotic resistance has diminished the efficacy of many once reliable  
3 therapeutics. In fact, resistance to every class of antibiotics has been observed clinically. The  
4 Review on Antimicrobial Resistance projected that drug resistant infections will be responsible for  
5 more than 10 million deaths a year by 2050 and cost the global economy over 100 trillion USD.  
6 Among the most prevalent pathogens that have been identified as particular concern are methicillin  
7 and vancomycin-resistant strains of *Staphylococcus aureus*<sup>1</sup>.

8 Methicillin resistant *Staphylococcus aureus* (MRSA), an opportunistic gram-positive bacterium,  
9 is the leading cause of healthcare associated infections as well as invasive systemic infections,  
10 pneumonia and skin and soft tissue infections (SSTIs) worldwide. The CDC reports over 80,000  
11 invasive MRSA infections annually in the United States, more than 11,000 of which are fatal,  
12 which has prompted the CDC to classify drug resistant MRSA as a ‘Serious Threat’<sup>2</sup>.

13 The antifolate combination of trimethoprim and sulfamethoxazole (co-trimethoxazole), marketed  
14 as Bactrim or Septra, is a first line treatment for community acquired skin and soft tissue MRSA  
15 infections. Trimethoprim targets dihydrofolate reductase (DHFR) which is responsible for the  
16 NADPH-dependent reduction of dihydrofolate (DHF) to tetrahydrofolate (THF). DHFR is the only  
17 source for the recycling of THF in the cell. When employed in conjunction with sulfamethoxazole,  
18 which targets dihydropteroate synthase, this powerful synergistic antibacterial combination results  
19 with potent coverage against both Gram-negative and Gram-positive pathogens. Due to its broad  
20 spectrum of activity, oral bioavailability and general tolerability, prescriptions of TMP-SMX  
21 numbered more than 21 million in 2013, putting it in the group of top ten oral antibiotics  
22 prescribed<sup>3</sup>.

23 Currently, trimethoprim is the sole FDA-approved antibiotic targeting DHFR. A second  
24 compound, iclaprim, a structurally similar DHFR inhibitor with anti-staphylococcal activity, has  
25 recently completed a Phase III clinical trial for acute bacterial skin and skin structure (ABSSI)  
26 infections<sup>4</sup>. DHFR inhibitors are historically grouped into two classes: lipophilic and classical.  
27 Trimethoprim and iclaprim are lipophilic antifolates as they contain a 2,4-diaminopyrimidine  
28 pharmacophore and passively diffuse into the cytosolic space. Methotrexate and pemetrexed, both  
29 chemotherapeutics, are known as classical antifolates as they possess a glutamate moiety in their  
30 structure, Figure 1. As mimics of the natural substrate DHF, classical antifolates show high affinity  
31 to all DHFR enzymes, however due to the negatively charged glutamate tail (net charge= -2), these  
32 compounds must be actively transported into the cell via specific folate carriers. Since bacteria do  
33 not have these transport mechanisms, classical antifolates do not show significant antibacterial  
34 efficacy despite powerful inhibition of bacterial DHFR.

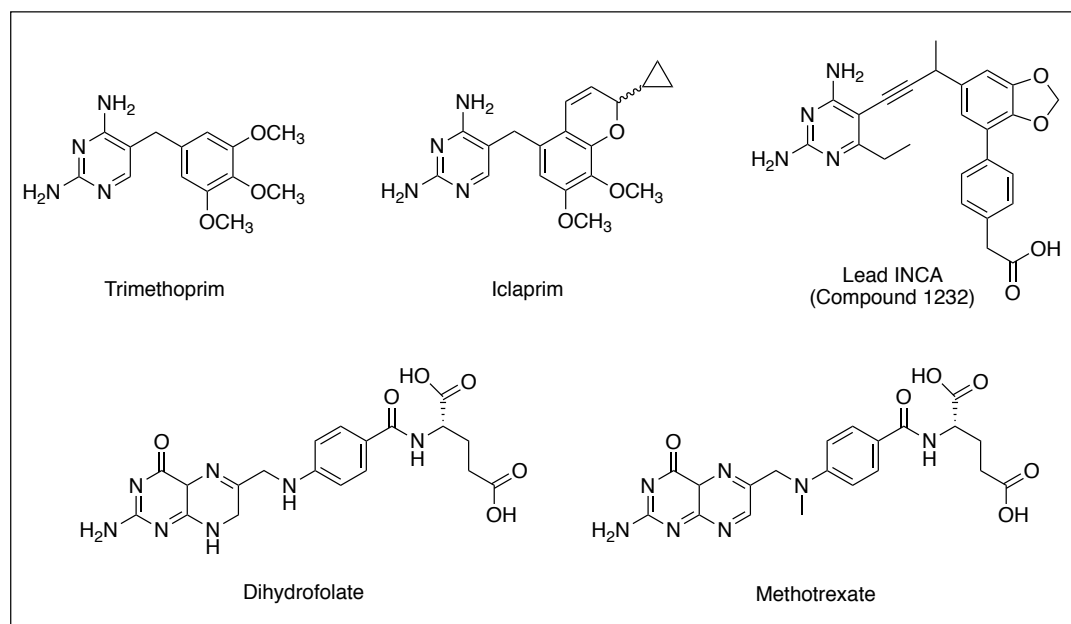

35  
36 **Figure 1:** Structures of antifolates discussed in this study. Trimethoprim and iclaprim (top row)  
37 are both lipophilic antifolates with antibacterial activity. Methotrexate is a classical antifolate  
38 that mimics the natural substrate dihydrofolate. Compound **1232** is a lead ionized non-classical  
39 antifolate (INCA).  
40

41 Trimethoprim resistance in *S. aureus* was first recognized in the 1980s following its clinical  
42 introduction in 1968. In the 1990s, two primary resistance mechanisms were identified as  
43 conferring clinical TMP resistance (TMP<sup>R</sup>): point mutations in the endogenous TMP sensitive  
44 (TMP<sup>S</sup>) chromosomal DHFR gene *dfrB* and the acquisition of an innately resistant DHFR enzyme,  
45 *dfrA*<sup>5,6</sup>. Recently two additional plasmid-encoded DHFR resistance genes, *dfrG* and *dfrK*, began  
46 appearing in MRSA infections both abroad and domestically. The *dfrG*, gene, encoding the TMP<sup>R</sup>  
47 DHFR enzyme DfrG (referred to as S2 DHFR), was first isolated in Thailand and later isolated in  
48 South Africa where its import to Europe was tracked via epidemiological studies<sup>7,8</sup>. *dfrK*, encoding  
49 the protein DfrK, was predominately associated with agricultural, specifically swine associated  
50 infections and began recently appearing in farmers and children in farm villages in Ireland<sup>9</sup>. We  
51 recently identified *dfrG* and *dfrK* in clinical strains of MRSA from Connecticut hospitals, with  
52 *dfrG* being the predominant resistance determinant<sup>10</sup>. Our observations were mimicked in other  
53 studies identifying DfrG in as many as 78% of TMP<sup>R</sup> isolates followed by *dfrA*, *dfrK* variants.  
54 Strains with mutant DfrB were seldom isolated<sup>11,12</sup>.

55 We have been developing next generation DHFR inhibitors against TMP-resistant Gram-  
56 positive<sup>13,14</sup>, Gram-negative<sup>15,16</sup> and mycobacterial<sup>17</sup> pathogens. These compounds feature a 6-  
57 ethyl-2,4-diaminopyrimidine moiety linked to a meta-biaryl system through an acetylenic linker  
58 (Figure 1). Recently, we disclosed a distinct class of antifolates designated as ionized non-classical  
59 antifolates (INCA), that are characterized by acidic functionality in the C-ring to capture the  
60 powerful interaction between the glutamate tail of classical antifolates and DHFR<sup>14</sup>. Importantly,  
61 this modification alters the charge distribution of INCAs to anionic/zwitterionic relative to earlier  
62 generations that are cationic/neutral. Additionally, this mono-carboxylate design allows us to  
63 exploit the key interactions used in substrate/classical antifolate binding while still maintaining the

64 ability to passively penetrate the bacterial membrane. INCA leads exhibit strong potency against  
65 the wild-type and TMP<sup>R</sup> mutant enzymes as well as clinically isolated strains containing the newly  
66 discovered *dfrG* and *dfrK* genes<sup>10</sup>.

67 With the exception of iclaprim, there has been a notable lack of development of therapeutics  
68 targeting dihydrofolate reductase in the antibacterial space. Herein, we have report a series of  
69 INCA antifolates that directly target the endogenous and acquired DHFR isoforms that confer  
70 trimethoprim and iclaprim resistant phenotypes. Using biochemical, microbiological, structural  
71 and computational techniques we are able to asses these compounds as potential antibacterial  
72 therapeutics.

73

## 74 **Results and Discussion**

75 A panel of clinically isolated TMP<sup>R</sup> MRSA and their corresponding DHFR enzymes,  
76 representative of the resistance landscape reported in recent literature was assembled for this study.  
77 This panel is comprised of isolates containing both a wild-type endogenous *dfrB* gene as well as  
78 either *dfrA*, *dfrG* or *dfrK* TMP<sup>R</sup> genes, Table 1. The clinical isolates, which have been previously  
79 characterized, were collected during the course of routine clinical care from Connecticut hospitals,  
80 show unique clonality and exhibit diverse antibiotic phenotypes<sup>10</sup>.

81 Of the enzymes discussed in this study, the origins, biochemical and structural features of *dfrA*  
82 have been best characterized<sup>6,19</sup>. DfrA has accumulated three important mutations compared to its  
83 TMP<sup>S</sup> *S. epidermidis* counterpart (F98Y, G43A and V31L) that are responsible for high-level TMP  
84 resistance. While the origins of *dfrG* and *dfrK* are still unknown, it is believed that enzymes are  
85 related to *Bacillus spp.* DfrK and DfrG share a 90% sequence identity to each other, but only share  
86 a 41.5% and 42.1% sequence identity to DfrB and 38.5% and 39.8% to DfrA, respectively,

87 Supplemental Figure S1. Despite low sequence identity, these enzymes show high homology  
88 within the active site. With the exception of a Leu5 to Ile substitution in the DfrA, DfrG, and DfrK  
89 proteins, the residues which make hydrogen bonds to the substrate, Glu27, Phe92 and Arg57,  
90 remain conserved throughout the acquired enzymes. A sequence alignment is reported in  
91 Supplemental Figure S2. DfrG and DfrK also contain the Tyr98 and Tyr149 substitutions.  
92 Mutations at these three of these positions are known to confer TMP resistance in the chromosomal  
93 DfrB enzyme<sup>18</sup>.  
94 All clinical isolates used in this study exhibit high levels of antifolate resistance, Table 1. The *dfrG*  
95 and *dfrK* containing isolates, UCH121 and HH184, exhibited the highest levels of resistance to  
96 both trimethoprim and iclaprim with MIC values of >1000 µg/mL and >250 µg/mL, respectively.  
97 The *dfrA* containing strain, UCH115, also succumbs to high level antifolate resistance with MIC  
98 values of 250 µg/mL for trimethoprim and 64 µg/mL for iclaprim. Minimally, the presence of these  
99 resistant enzymes in the clinical isolates results in an 800-fold loss in cellular efficacy when  
100 compared to the TMP<sup>S</sup> comparator, ATCC 43300. Overall, iclaprim is unable to evade any of these  
101 prevalent TMP resistant elements rendering the compound largely ineffective against existing  
102 TMP<sup>R</sup> isolates.

103

104 **Table 1** *Staphylococcus aureus* strains used in this study

| Strain    | TMP <sup>R</sup> Determinant | Minimum Inhibitory Concentrations (µg/mL) |          |      |
|-----------|------------------------------|-------------------------------------------|----------|------|
|           |                              | TMP                                       | Iclaprim | MTX  |
| UCH115    | <i>dfrA</i>                  | 250                                       | 64       | >250 |
| UCH121    | <i>dfrG</i>                  | >1000                                     | >250     | >250 |
| HH1184    | <i>dfrK</i>                  | >1000                                     | >250     | >250 |
| ATCC43300 | N/A                          | 0.312                                     | 0.039    | 125  |

105

106 In addition to cellular evaluations of *dfrG*, *dfrK* and *dfrA* containing strains, their corresponding  
107 recombinant enzymes, DfrG, DfrK and DfrA, were generated for kinetic and inhibitory enzymatic

108 evaluations. Both the wild type DHFR and the TMP<sup>R</sup> enzymes display the typical hyperbolic  
109 progression of Michaelis-Menten kinetics. The initial rates for DHF were applied for determination  
110 of  $K_M$ ,  $k_{cat}$  and  $k_{cat}/K_M$  as summarized in Table 2. Kinetic analysis of  $K_M$  (DHF) values revealed that  
111 the TMP-resistant enzymes are comparable to the wild type DHFR. Overall, the substrate binding  
112 affinities of DfrK and DfrG are very similar to that found in DfrB, with  $K_M$  values of 11.01, 8.87  
113 and 13.35  $\mu\text{M}$ , respectively. DfrA displays tighter interaction with DHF with approximately a two-  
114 fold decrease in  $K_M$  with a value of 5.76  $\mu\text{M}$ . The specificity constants ( $k_{cat}/K_M$ ) of the TMP-  
115 resistant enzymes are also highly comparable to those of the wild type. A two-fold higher  
116 efficiency of DfrA enzyme, with a  $K_{cat}/K_M$  of  $0.72 \mu\text{M}^{-1}/\text{s}^{-1}$ , is due to the increased binding affinity  
117 to DHF while the turnover rates for the other two TMP-resistant enzymes are very similar relative  
118 to the wild type DHFR, Table 2.

119 The resistance phenotypes observed for trimethoprim and iclaprim in the clinical isolates were  
120 recapitulated in their enzyme inhibitory activities, Table 2. DfrG conferred the highest level of  
121 resistance to both trimethoprim and iclaprim with  $K_i$  values of  $30.96\mu\text{M}$  and  $1.4\mu\text{M}$ , a  $>11,400$   
122 and 774-fold loss when compared to the DfrB values of 2.7 and 1.8nM respectively. Likewise,  
123 DfrA and DfrK both exhibit steep losses in affinity toward trimethoprim with  $K_i$  values of 820nM  
124 and 4,260nM, a  $>300$  and  $>1500$ -fold loss potency, respectively. Iclaprim maintains higher  
125 potency against DfrK and DfrA than with DfrG with  $K_i$  values of 221 and 90nM, respectively.  
126 Unlike the poor inhibitory activity of the lipophilic antifolates in these enzymes, methotrexate  
127 maintains potent activity regardless of DHFR identity with  $K_i$  values of 0.71 nM for DfrB and 1.8,  
128 2.47 and 0.38nM for DfrG, DfrK and DfrA, respectively.

129



130 **Table 2** Enzyme Kinetics and Inhibition for TMP<sup>R</sup> Elements and Clinical Antifolates

|       | Enzyme Inhibition <sup>a</sup> , K <sub>i</sub> (nM) |                                        |                                                  |                   |                  |                 |
|-------|------------------------------------------------------|----------------------------------------|--------------------------------------------------|-------------------|------------------|-----------------|
|       | K <sub>M</sub> , DHF<br>( $\mu$ M)                   | K <sub>cat</sub><br>(s <sup>-1</sup> ) | K <sub>cat</sub> /K <sub>M</sub><br>( $\mu$ M/s) | Trimethoprim      | Iclaprim         | Methotrexate    |
| DfrB  | 13.4                                                 | 4.66                                   | 0.34                                             | 2.7 $\pm$ 0.2     | 1.8 $\pm$ 0.2    | 0.71 $\pm$ 0.08 |
| DfrA  | 5.76                                                 | 4.12                                   | 0.72                                             | 820 $\pm$ 40      | 90 $\pm$ 3       | 0.38 $\pm$ 0.04 |
| DfrG  | 8.9                                                  | 3.57                                   | 0.40                                             | 30,960 $\pm$ 1390 | 1350 $\pm$ 10    | 1.8 $\pm$ 0.1   |
| DfrK  | 11.0                                                 | 3.82                                   | 0.35                                             | 4,260 $\pm$ 200   | 221 $\pm$ 6      | 2.47 $\pm$ 0.01 |
| Human | 10.53                                                | 3.16                                   | 0.30                                             | 7,860 $\pm$ 560   | 32,500 $\pm$ 500 | 2.28 $\pm$ 0.01 |

131 <sup>a</sup> K<sub>i</sub> values are average of three experiments  $\pm$ SD

### 132 **Design and Evaluation of Ionized Non-Classical Antifolates (INCAs).**

133 During the last decade, we have developed and evolved the propargyl-extended antifolates from  
134 TMP like derivatives<sup>20</sup> to highly functionalized inhibitors that have been tailored to the SaDHFR  
135 active site<sup>10</sup>. Most recently, we have developed a new class of ionized non-classical antifolates  
136 (INCAs) featuring a distal benzoic acid that added MTX-like character to the inhibitors, Figure 2.  
137 Through structure-based drug design, we have been able to establish a preliminary structure  
138 activity relationship between these benzoic acid inhibitors, interactions with Arg57 and potency.  
139 Crystal structures of the first-generation carboxylate compounds with an unsubstituted propargylic  
140 position indicated a highly coordinated water network between the *para*-benzoic acid and Arg57.  
141 Branching from the propargylic carbon with a simple methyl group displaces the biaryl system  
142 toward the Arg57 residue effectively disrupting the water network and forming one direct  
143 hydrogen bonding and one water-mediated interaction with the guanidinium side chain. While  
144 inhibitors that form water-mediated and pseudo-direct hydrogen bonding interactions with Arg57  
145 have shown improved potency over trimethoprim, the MIC discrepancy between the DfrG, DfrK  
146 and DfrA containing strains were up to 64-fold<sup>10</sup>. When designing across resistant targets, it is  
147 important that the MICs across target isoforms have only small deviation to ensure the widest  
148 possible coverage. Given the broad potency of MTX against the DfrA, DfrG and DfrK enzymes,  
149 it was hypothesized that fine tuning of the interaction between the INCA carboxylate moiety and

150 the conserved arginine sidechain would be a powerful strategy to achieving broad-based activity  
151 against these redundant DHFR containing isolates.

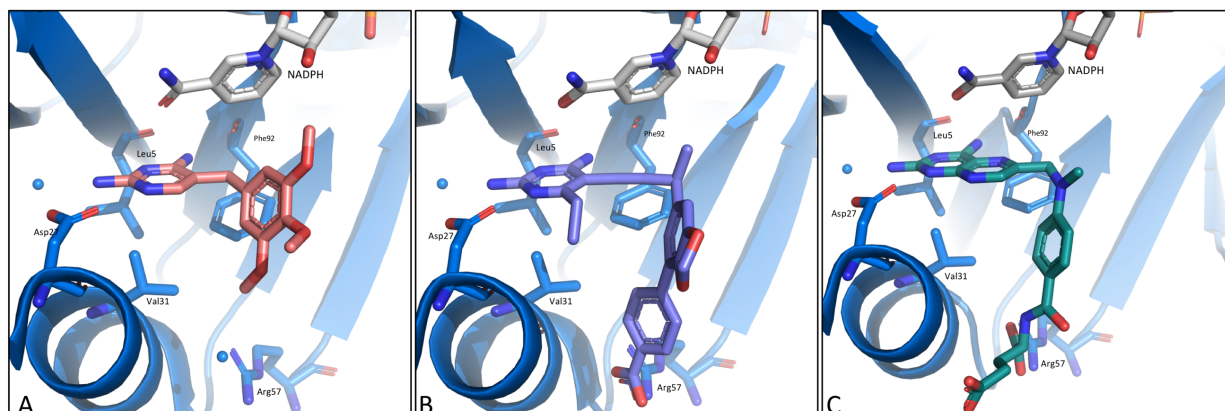

152 **Figure 2:** Antifolates in the SaDHFR active site A) Trimethoprim B) Compound 1191  
153 C) Methotrexate

154  
155  
156 In order to facilitate the refinement of our INCA leads, we first obtained a crystal structure of the  
157 DfrB:NADPH:MTX ternary complex to better understand the binding mode of MTX to the  
158 bacterial reductase. In this structure, MTX makes extensive hydrogen bonding interactions with  
159 the protein's active site including the Asp27 side chain, an active site water and the backbone  
160 carbonyls of Leu5 and Phe92. These contacts are supplemented with dual hydrogen bonds formed  
161 between the guanidinium side chain of Arg57 and the glutamate tail. The major structural  
162 difference between the human (PDB ID: 1DLS)<sup>21</sup> and *S. aureus* structures is a loss of a hydrogen  
163 bonding interaction between the amide carbonyl of MTX and Asn64 side chain; this residue is  
164 replaced by a glycine in all DfrB as well as DfrA, DfrG and DfrK isoforms. Lipophilic antifolates,  
165 trimethoprim and iclaprim, maintain their interactions with the diaminopyrimidine binding pocket,  
166 however contacts with the distal Arg57 has always been an exclusive feature of classical  
167 antifolates. Moreover, the potential value of adding this functionality to antibacterial agents has  
168 been recognized as a tool to overcome resistance to point mutations, as this residue is unlikely to  
169 mutate without encountering a major fitness cost<sup>22</sup>.

170 We hypothesized that the placement of an additional carbon between the distal aryl ring and  
 171 carboxylate would allow for a more productive MTX-like interaction. Therefore, a matched series  
 172 of five benzoic acid and phenyl acetic acid inhibitors were synthesized, following previously  
 173 reported synthetic strategies, for structural, biochemical and microbiological evaluations, Table  
 174 3.<sup>13,16</sup>

175 **Table 3** Structures of INCA Compounds

| Compound | R <sub>P</sub>    | R <sub>1</sub>   | R <sub>2</sub>   | R <sub>3</sub> | C-ring 'X'           |
|----------|-------------------|------------------|------------------|----------------|----------------------|
| 1271     | CH <sub>3</sub>   | Dioxolane        | H                | H              | COOH                 |
| 1270     | CH <sub>3</sub>   | Dioxolane        | H                | H              | CH <sub>2</sub> COOH |
| 1273     | CH <sub>3</sub>   | OCH <sub>3</sub> | H                | H              | COOH                 |
| 1274     | CH <sub>3</sub>   | OCH <sub>3</sub> | H                | H              | CH <sub>2</sub> COOH |
| 1229     | CH <sub>3</sub>   | Cl               | H                | H              | COOH                 |
| 1247     | CH <sub>3</sub>   | Cl               | H                | H              | CH <sub>2</sub> COOH |
| 1268     | CH <sub>3</sub>   | H                | OCH <sub>3</sub> | H              | COOH                 |
| 1172     | R-CH <sub>3</sub> | H                | OCH <sub>3</sub> | H              | COOH                 |
| 1173     | S-CH <sub>3</sub> | H                | OCH <sub>3</sub> | H              | COOH                 |
| 1267     | CH <sub>3</sub>   | H                | OCH <sub>3</sub> | H              | CH <sub>2</sub> COOH |
| 1284     | R-CH <sub>3</sub> | H                | OCH <sub>3</sub> | H              | CH <sub>2</sub> COOH |
| 1285     | S-CH <sub>3</sub> | H                | OCH <sub>3</sub> | H              | CH <sub>2</sub> COOH |
| 1191     | CH <sub>3</sub>   | H                | Dioxolane        | H              | COOH                 |
| 1232     | CH <sub>3</sub>   | H                | Dioxolane        | H              | CH <sub>2</sub> COOH |

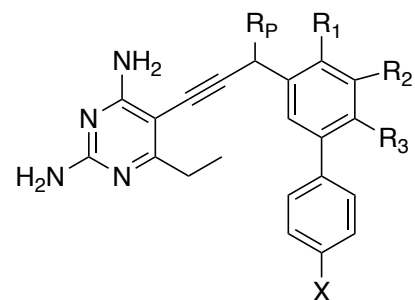

176  
 177 These compounds demonstrated excellent inhibitory affinity ( $K_i$  values <1.2 nM) toward the wild-  
 178 type enzyme, DfrB. In the case of the benzoic acid series, introducing a R<sub>1</sub>,R<sub>2</sub>-dioxolane (**1271**)  
 179 substituted B-ring enhanced the enzymatic inhibition by 10-fold relative to a R<sub>1</sub>-OCH<sub>3</sub> (**1273**)  
 180 substituted compound. In addition, replacing the R<sub>1</sub>-OCH<sub>3</sub> with a R<sub>1</sub>-Cl (**1229**) further enhanced  
 181 the binding affinity by 2-fold. In comparison, the phenyl acetic acid INCAs either retained or  
 182 increased their potency for DfrB relative to their benzoate congeners with R<sub>1</sub>-substituted B-ring  
 183 systems demonstrating the most profound effects. For example, compound **1247** (R<sub>1</sub>-Cl) exhibited  
 184 the most potent enzyme inhibition with a  $K_i$  of 1.2 nM, an 8-fold increase relative to its benzoic

185 acid analog. This observation supported our hypothesis that increase in proximity and flexibility  
 186 creates better interactions between the ionized extended-carboxylates and the conserved arginine.  
 187 When evaluated against TMP<sup>R</sup> enzymes, the INCAs were >1000-fold more potent than TMP and  
 188 showed over 100-fold greater inhibitory activity relative to iclaprim against DfrA, DfrG and DfrK.  
 189 Changing the B-ring substitution from R<sub>1</sub>-OMe to a R<sub>1</sub>, R<sub>2</sub>-dioxolane or R<sub>1</sub>-Cl had a positive effect  
 190 across all three enzymes. Notably, **1229** showed 3, 215 and 150-fold increases in enzyme inhibition  
 191 against DfrA, DfrG and DfrK, respectively, when compared to **1273**. Furthermore, all phenyl  
 192 acetic acid INCAs showed enhanced inhibition against DfrA and DfrG when compared to their  
 193 benzoic acid counterparts, with the most potent compound, **1267** having a K<sub>i</sub> value of 2.2 nM for  
 194 DfrA. For DfrK, all extended acid INCAs exhibited comparable activity to their benzoic acid  
 195 partners. Based on this data, it is apparent that the extension of the anionic functionality was most  
 196 beneficial for DfrA, followed by DfrG and DfrK with modest to little improvements.

197

198 **Table 4** Enzymatic inhibition of Dfr Isozymes by INCA compounds<sup>a</sup> (K<sub>i</sub>, nM)

|      | DfrB       | DfrA       | DfrG      | DfrK      | Human Selectivity <sup>b</sup> |
|------|------------|------------|-----------|-----------|--------------------------------|
| 1271 | 2.1 ±0.1   | 216 ±10    | 16 ±1     | 15 ±2     | 16.9                           |
| 1270 | 2.98 ±0.09 | 9.8 ±0.9   | 13 1      | 6.2 ±0.2  | 23.9                           |
| 1273 | 20 ±2      | 520 ±30    | 1550 ±140 | 280 ±30   | 4.4                            |
| 1274 | 6.2 ±0.5   | 11.5 ±0.4  | 260 ±20   | 15.6 ±0.6 | 9.6                            |
| 1229 | 10.4 ±0.2  | 15 ±2      | 7.2 ±0.5  | 1.8 ±0.2  | 2.7                            |
| 1247 | 1.17 ±0.01 | 2.9 ±0.1   | 14 ±2     | 1.6 ±0.1  | 99.2                           |
| 1268 | 1.76 ±0.06 | 9.7 ±0.4   | 13 ±1     | 3.4 ±0.3  | 18.9                           |
| 1172 | 1.08 ±0.08 | 21.8 ±0.5  | 18 ±1     | 3.0 ±0.1  | 50.4                           |
| 1173 | 1.6 ±0.1   | 15 ±1      | 16 ±1     | 9.0 ±0.8  | 46.1                           |
| 1267 | 2.2 ±0.2   | 2.2 ±0.2   | 40 ±3     | 4.2 ±0.4  | 16.7                           |
| 1284 | 2.1 ±0.2   | 3.0 ±0.3   | 73 ±3     | 8.1 ±0.4  | 24.7                           |
| 1285 | 4.0 ±0.1   | 16 ±1      | 15 ±1     | 4.0 ±0.2  | 20.3                           |
| 1191 | 1.17 ±0.02 | 17 ±1      | 6.3 ±0.4  | 4.0 ±0.6  | 74.1                           |
| 1232 | 2.00 ±0.07 | 10.4 ±0.8  | 3.2 ±0.5  | 1.8 ±0.2  | 2.9                            |
| MTX  | 0.71 ±0.08 | 0.38 ±0.04 | 1.9 ±0.1  | 2.5 ±0.1  | 4.0                            |

199 <sup>a</sup>K<sub>i</sub> values are average of three experiments ±SD <sup>b</sup>Human selectivity is the IC<sub>50</sub> ratio of HuDHFR  
 200 to SaDHFR. Human and bacterial DHFR IC<sub>50</sub> values are reported in the Supplemental Table S1.

201 Ideally, new generation DHFR inhibitors would have sufficient selectivity over human enzyme to  
202 avoid concomitant inhibition. Therefore, all new INCAs were tested against human DHFR isoform  
203 (HuDHFR) to evaluate their enzymatic selectivity. From the SAR data, it was apparent that the  
204 nature of substituents on the B- and C-rings of INCAs had an immense effect on their inhibitory  
205 activities against human DHFR. For shorter benzoic acids, moving the substitutions in B-ring from  
206 R<sub>1</sub>-OMe to any other position demonstrated increased selectivity, or decreased affinity towards  
207 HuDHFR. Interestingly, extension of one carbon to the phenyl acetic acid improved the selectivity  
208 for R<sub>1</sub>-substituted B-ring systems, but had a detrimental effect on other B-ring systems. Notably,  
209 compound **1247** had a 33-fold increase in selectivity for the pathogenic enzymes compared to its  
210 benzoic acid analog.

211  
212 All new INCAs were evaluated for antibacterial inhibition against the panel of TMP<sup>S</sup> and TMP<sup>R</sup>  
213 isolates. Overall, these compounds maintained potent activity against wild-type ATCC43300  
214 quality control strains with MIC values between 0.4 and <0.001 µg/mL, with the R<sub>1</sub>-Cl inhibitors  
215 (**1229** and **1247**) being most potent with MICs below 1 ng/mL. In general, the extension from  
216 benzoic acid to phenyl acetic acid had only a minor effect (1-2 fold increase) on potencies against  
217 the wild-type strain. Interestingly, MIC values for UCH121 and HH1184, which contain the *dfrG*  
218 and *dfrK* resistance genes, range from 0.625-10 and 0.3125 - 2.5µg/mL, respectively. The most  
219 active compounds from the benzoic acid series exhibited a >400 and >1,600- fold increase in  
220 potency compared to iclaprim and trimethoprim, respectively. For these strains, the majority of the  
221 phenyl acetic acid series were comparable or within two fold of their benzoic acid partner.  
222 MIC values for the *dfrA* containing strain, UCH115 range from 1.25-20µg/mL, a 200 and 500-fold  
223 increase in activity when compared to trimethoprim and iclaprim. Moreover, for UCH115, the  
224 extended acids exhibited a moderate increase in potency over the benzoic acid analogs. For the

225 R<sub>1</sub>,R<sub>2</sub> dioxolane compounds, **1191** and **1232**, the one carbon extension reduced the MIC from 20  
 226 to 2.5µg/mL, putting the MIC within 4-fold of the DfrG and DfrK containing strains. When tested  
 227 against single and double mutant strains, most of the extended acid INCAs showed a considerable  
 228 increase in activity. Owing to its substantially improved activity, **1247** and **1232** have been  
 229 identified as lead INCA compounds against TMP<sup>R</sup> *S. aureus* pathogens.

230 **Table 5** Minimum Inhibitory Concentrations

|      | Minimum Inhibitory Concentrations (µg/mL) |                           |                           |                           | Mammalian Toxicity IC <sub>50</sub><br>(µg/mL) <sup>a</sup> |        |
|------|-------------------------------------------|---------------------------|---------------------------|---------------------------|-------------------------------------------------------------|--------|
|      | ATCC<br>43300                             | UCH115<br>( <i>dfrA</i> ) | UCH121<br>( <i>dfrG</i> ) | HH1184<br>( <i>dfrK</i> ) | MCF10A                                                      | HepG2  |
| 1271 | 0.005                                     | >10                       | 0.625                     | 0.312                     | >200                                                        | >200   |
| 1270 | 0.0025                                    | 2.5                       | 1.25                      | 0.625                     | >200                                                        | >200   |
| 1273 | 0.04                                      | 10                        | 10                        | 1.25                      | >200                                                        | >200   |
| 1274 | 0.04                                      | 5                         | 10                        | 1.25                      | 167 ±3                                                      | >200   |
| 1229 | <0.001                                    | 5                         | 2.5                       | 0.625                     | 49.0 ± 0.7                                                  | 99 ± 2 |
| 1247 | <0.001                                    | 2.5                       | 2.5                       | 0.312                     | ND <sup>b</sup>                                             | ND     |
| 1268 | 0.004                                     | 10                        | 1.25                      | 0.625                     | >200                                                        | >200   |
| 1172 | 0.010                                     | 5                         | 0.625                     | 0.312                     | 169 ±3                                                      | >200   |
| 1173 | 0.010                                     | 2.5                       | 5                         | 2.5                       | ND                                                          | ND     |
| 1267 | 0.002                                     | 1.25                      | 2.5                       | 2.5                       | 169 ±4                                                      | 181 ±3 |
| 1284 | 0.010                                     | 1.25                      | 10                        | 5                         | 166 ±3                                                      | 164 ±3 |
| 1285 | 0.02                                      | 5                         | 5                         | 1.25                      | >200                                                        | >200   |
| 1191 | 0.020                                     | 20                        | 0.625                     | 0.156                     | ND                                                          | ND     |
| 1232 | 0.010                                     | 2.5                       | 0.625                     | 0.625                     | >200                                                        | >200   |
| MTX  | 125                                       | >250                      | >250                      | >250                      | ND                                                          | ND     |

231 <sup>a</sup>Toxicity shown as the average of three independent measurements ± SD. <sup>b</sup>ND: Not determined

232 An area of major importance in developing antibacterial DHFR inhibitors is achieving adequate  
 233 selectivity over the human isoform. While the INCAs compounds tested here have less than 100-  
 234 fold selectivity for the human isoform over the pathogenic enzyme, these compounds exhibit very  
 235 little mammalian toxicity when tested against both MCF-10 and HepG2 cell lines. Most of the  
 236 INCA compounds had IC<sub>50</sub> values >200 µg/mL in both cell lines, Table 4. Compound **1229** was  
 237 the most cytotoxic compound tested with IC<sub>50</sub> values of 49 and 99µg/mL against MCF-10A and  
 238 HepG2 cell lines, respectively, correlating with its poor enzymatic selectivity of 3.6-fold. This

239 general lack of cytotoxicity may be attributed to the unique way in which human DHFR is  
240 regulated. It is well known that anticancer antifolates, for instance, require extraordinary target-  
241 level potency (MTX,  $K_i \sim 5 \text{ pM}$ )<sup>23</sup> as a consequence of rapid changes to DHFR protein levels.  
242 Bastow<sup>24</sup> was the first to report that MTX treatment increased the expression level of DHFR  
243 without affecting the levels of its mRNA. It was later shown that this upregulation was specific to  
244 humans<sup>25</sup> and involved DHFR directly binding its cognate mRNA in the coding region<sup>26</sup>.  
245 Moreover, DHFR translational upregulation is an intrinsic form of resistance that protects human  
246 cells from MTX toxicity<sup>27</sup>. This may be the one reason that low dose MTX is well tolerated enough  
247 to allow for therapeutic applications outside of oncology. For example it is the first-line treatment  
248 for rheumatoid arthritis<sup>28</sup> and is used in the management of psoriasis<sup>29</sup> and ulcerative colitis<sup>30</sup>. We  
249 have determined that this effect is mirrored by treatment of HL-60 cells with both **1232** and MTX  
250 but not iclaprim. This indicates that MTX and INCAs induce a concentration dependent translation  
251 of human DHFR, potentially protecting the cells from the anti-HuDHFR enzymatic activity of  
252 these compounds (Supplemental Figure S3).

253

## 254 **Structural and Computational Studies**

255 To aid in the understanding of the observed efficacy and to guide future optimization efforts,  
256 several crystal structures with lead compounds, **1232** and **1267**, bound to the wild type *S. aureus*  
257 DHFR were solved. Crystals of DfrB:NADPH:**1232** and DfrB:NADPH:**1267** diffracted to 1.65Å  
258 and 2.73Å, respectively. Data collection and refinement statistics are presented in Table S1. The  
259 structure of the DfrB:NADPH:**1232** complex revealed the standard five hydrogen bonding  
260 interactions between the 6-ethyl diaminopyrimidine and Asp27 side chain (2.6Å and 3.1Å), an  
261 active site water (3.0Å), Phe92 (3.1Å), and Leu5 (3.0Å) backbone carbonyls. This configuration

262 also enables the compound to form several hydrophobic interactions between the Phe92, Leu28,  
263 Val31, Ile50 and Leu54 side chains. Additionally, the carboxylic moiety extends to form the  
264 intended dual hydrogen bonding interactions with the Arg 57 side chain, one at 2.6Å and the other  
265 at 3.1Å, Figure 3 panel B.

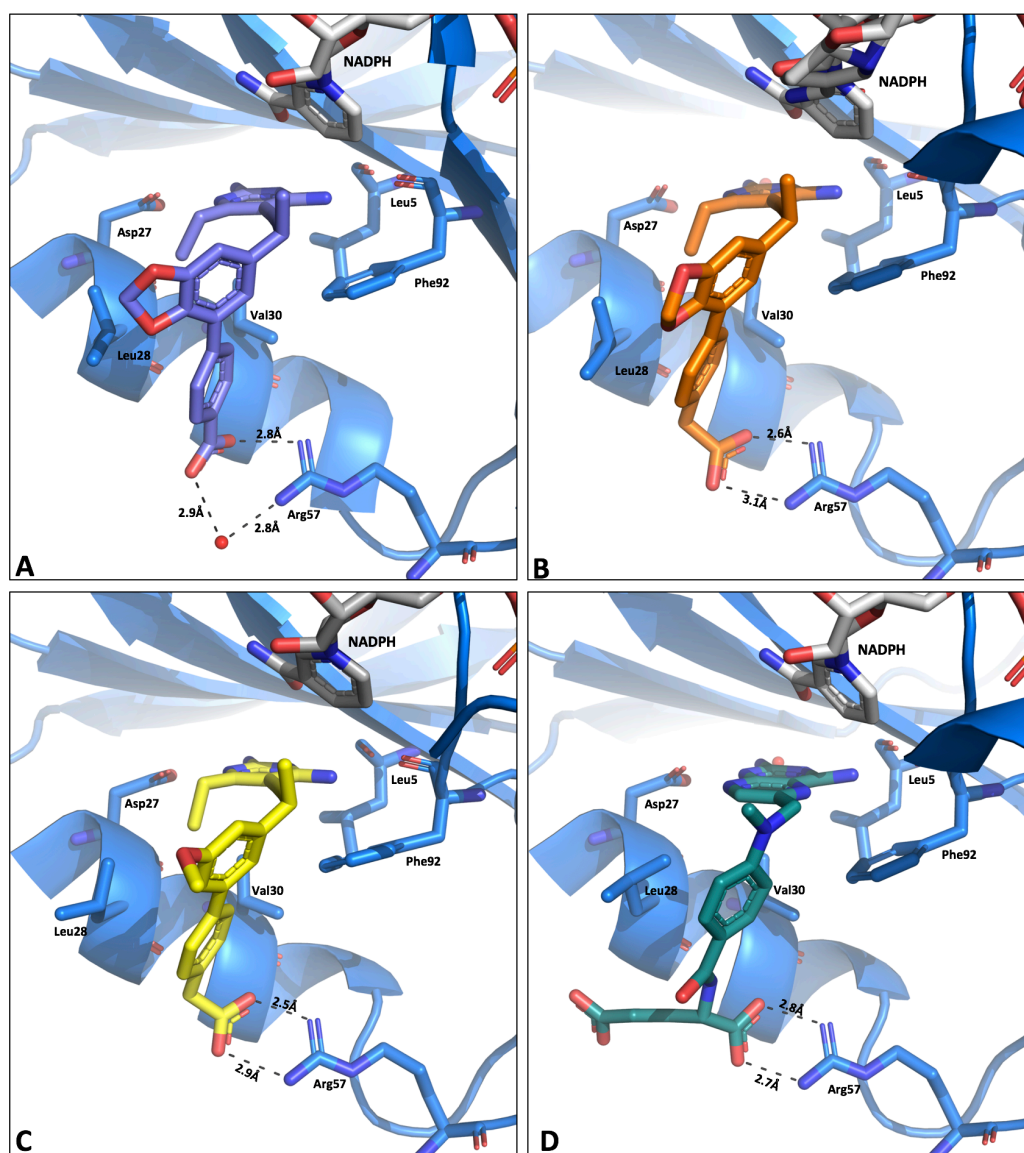

266

267 **Figure 3:** Crystal structures of A) 1191 B) 1232 C) 1267 and D) Methotrexate in the DfrB active  
268 site. This figure emphasizes the interactions between the distal acids of the INCAs/MTX and  
269 Arg57 residue. Panels B and C show the structural improvement of the phenyl acetic acid  
270 inhibitors over the benzoic acid series (panel A) and similarity to MTX (panel D).

271



272 Comparisons of its benzoic acid counterpart, **1191** (PDB ID:5JG0)<sup>10</sup>, reveal that the extension of  
273 the benzoic acid to phenyl acetic acid results in a 1.2Å displacement of the distal phenyl ring  
274 towards the Val31 helix. **1232** sits slightly above **1191**, 0.7Å closer to the NADPH binding pocket  
275 and this results in 2.2Å shift in the dioxolane binding. Despite the observed changes in the inhibitor  
276 binding mode, the protein's active site appears to accommodate the altered binding positions by  
277 maintaining the rotamer orientations and hydrophobic interactions between Leu54, Leu6, Leu28  
278 and Ile50. An overlay of these structures is presented in Supplemental Information, Figure S4.

279 Compounds **1232** and **1267** maintain very similar binding orientations within the *S. aureus* active  
280 site and the overall RMSD of the two structures is 0.253Å. Compound **1267** makes the conserved  
281 hydrogen bonding interactions with the active site water (2.6Å), Asp27 (2.6Å and 3.2Å), Phe92  
282 (2.9Å) and Leu5 (2.9Å) active site residues. The most notable deviations between these two  
283 structures is the binding position of the R<sub>2</sub>-OMe, which extends towards the Ile 50 at a 113° angle,  
284 whereas the R<sub>2</sub>,R<sub>3</sub>-dioxolane maintains a 102° bond angle in plane with proximal aryl ring. The  
285 methoxy binding orientation results in a 1Å shift of the Ile50 helix away from the inhibitor. This  
286 movement of the adjacent helix reduces the hydrophobic interactions between the inhibitor and Ile  
287 side chain. It is believed the rigidity of the fused ring system of **1232** allows for more optimal  
288 interactions between the inhibitor and protein.

289 Crystals of DfrB complexed with NADPH and methotrexate diffracted to 1.80Å. This structure  
290 shows two hydrogen bonding interactions between pterin rings and the side chain of Asp27 (2.6  
291 and 3.2Å) and backbone Leu5 (2.8Å) and Phe92 (2.9Å) as well as two hydrogen bonding  
292 interactions with Arg57 (2.7 and 2.8Å). Like in the human DHFR structures, the pterin binds in an  
293 opposite orientation than that of folate facilitating the hydrogen bonding interaction with Phe 92  
294 (PDB ID 3FRD<sup>31</sup>, Supplemental Figure S5). Interestingly, in the MTX structure a rotamer of

295 Leu28 makes more extensive hydrophobic interactions to the benzamide moiety of MTX than in  
296 the INCAs, as the binding position of the distal ring would likely clash with that residue.  
297 In order to better understand the molecular interactions between the INCA compounds and DfrG,  
298 we constructed a homology model of DfrG active site, based on the crystal structure of DfrB bound  
299 to **1232** and NADPH. This homology model shows good overlay between the DfrB and DfrG  
300 active sites binding to **1232**, Figure 4. The DfrG structure maintains the seven hydrogen bonding  
301 interactions including Asp 27 side chain (both 3.0Å), I15 backbone (3.1Å) and Phe92 (3.2Å) with  
302 the diaminopyrimidine and two hydrogen bonding interactions between the Arg57 and C-ring  
303 substituted phenyl acetic acid (2.9Å and 2.7Å). The hydrophobic interactions with the Val31, Ile50  
304 and Phe92 are also maintained in these structures. Interestingly, DfrG contains a tryptophan in  
305 place of the Leu28 in the DfrB. This substitution increases the distance between the inhibitor and  
306 Leu28 (in DfrB) and Trp28 (in DfrG) from 3.6Å to 6.4Å, widening the distal region of the active  
307 site and effectively reducing the hydrophobic interactions with **1232**.

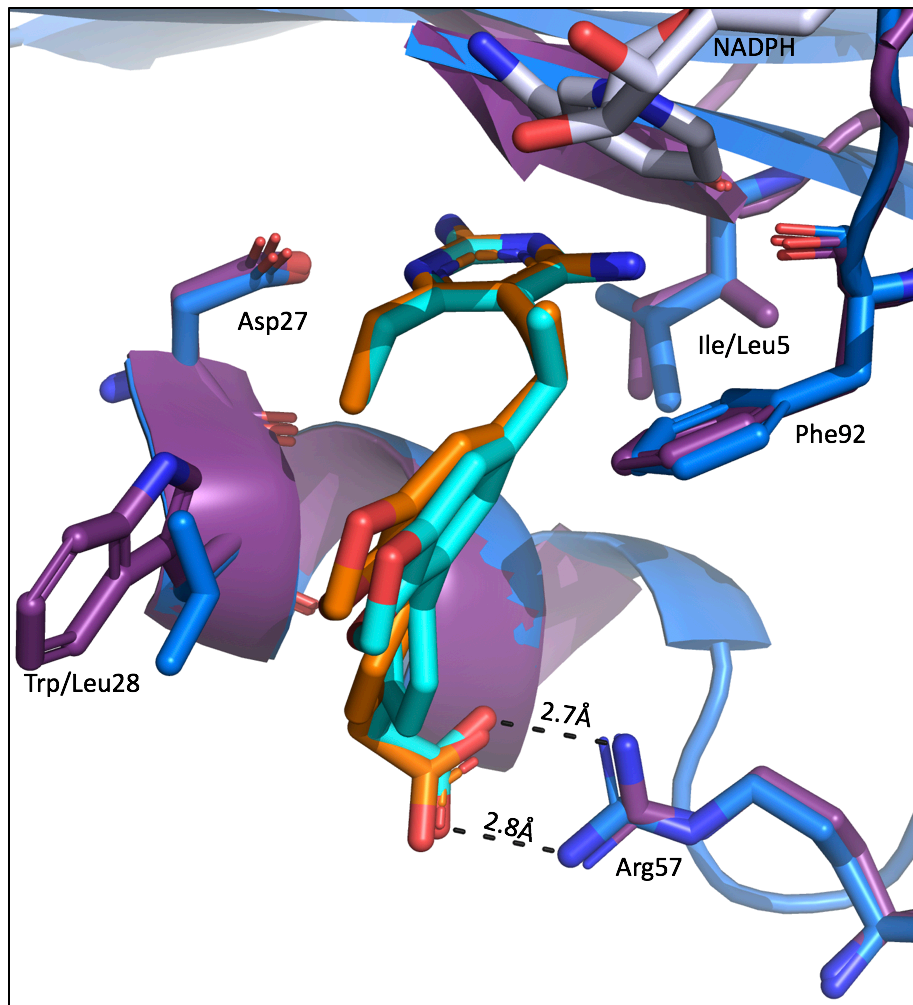

308  
309 **Figure 4:** Overlay of DfrB (dark blue) with **1232**(orange) and DfrG homology model (purple)  
310 with **1232** (light blue). Active site residues shown as sticks.  
311

312 Finally, we were interested in examining the conformational re-organization that these ligands  
313 undergo upon binding with bacterial DHFR and evaluating their associated energy penalties.  
314 Therefore, two different dihedrals angles, the dihedral angle between propargylic methyl and the  
315 aromatic B ring, and the dihedral angle between aromatic B and C rings were chosen for analysis.  
316 Molecular dynamic calculations performed on a paired set of benzoic acid and phenyl acetic acid  
317 ligands, **1191** and **1232** generated two separate minimum energy conformers for each ligands and  
318 were further compared with their bioactive conformers. We observed (Supplemental Table 3 and

319 Supplemental Figure 6) that to gain the overall stabilization in the active site of the bacterial DHFR  
320 the narrow dihedral angles (4 to -18°) between propargylic methyl and aromatic B-ring were well  
321 tolerated in all of the bioactive conformers overriding the conformational bias of larger (99 to 110°)  
322 dihedral angles in the minimum energy structures. In order to make optimal interactions with the  
323 distal arginine via the dual H-bonding this dihedral angle expanded from 3.5° in shorter benzoic  
324 acid, **1191** to -16.1° in phenyl acetic acid, **1232**. Further, this overall stabilizing event also led to  
325 the 8 to 14° constrictions in the dihedral angles between the biphenyl (aromatic B and C rings)  
326 systems for phenyl acetic acid INCAs, and a 16° constriction of this dihedral angle in extended  
327 acid **1232**.

328

### 329 **Conclusion**

330 Recent identification of trimethoprim resistance mechanisms in *S. aureus* has prompted us to pursue  
331 the development of pan-DHFR inhibitors. Herein, we have been able to develop a hybrid class of  
332 antifolates that capture a key electrostatic interaction common to classical antifolates without  
333 compromising the bacterial permeability associated with lipophilic antifolates. Moreover,  
334 structure-activity relationships indicate that it should still be possible to achieve target-level  
335 selectivity even when exploiting this highly conserved interaction. It is noteworthy that developing  
336 compounds that simultaneously target both the endogenous and acquired enzymes has been a  
337 successful approach for the treatment of MRSA with 5<sup>th</sup> generation cephalosporins, which unlike  
338 the earlier generation cephalosporins, target the both the endogenous PBPs as well as the acquired  
339 PBP2a.

340 Crystal structures of the INCA compounds disclosed here indicate several highly coordinated  
341 hydrogen bonding interactions between the inhibitor and enzyme active site, several of which have,

342 until now, been exclusive to classical antifolates. Adding ionic functionality to earlier generations  
343 of this antifolate class revealed a highly coordinated water network between the distal region of  
344 the inhibitor and the Arg57 residue of DfrB. Lead by crystal structures and biochemical  
345 evaluations, optimization of the proximal ring system and propargylic position allowed us to  
346 displace the water network to form a single hydrogen bonding interaction to displace the water  
347 network to form a single hydrogen bond and one water mediated interaction with the active site.  
348 Now, we have identified the optimal propargylic, proximal and distal substitutions to fully exploit  
349 the substrate binding pocket and gain potent activity across trimethoprim sensitive and resistant  
350 DHFR isoforms. Having identified several lead compounds, we can continue to improve and  
351 evaluate selectivity, determine and optimize pharmacokinetic properties and assess *in vivo*  
352 efficacy.

353

## 354 **Experimental**

### 355 Chemical Matter in This Study

356 Compounds **1172**, **1173**, **1191** and **1232** have been previously disclosed<sup>10,14</sup>. All novel compounds  
357 have been synthesized following published methods<sup>14</sup>. More thorough methods and compound  
358 characterization can be found in the Supplemental Information.

### 359 Minimum Inhibitory Concentrations

360 Minimum inhibitory concentrations (MICs) for trimethoprim (Sigma Aldrich), iclaprim, and  
361 INCAcompounds (all in DMSO) were determined following CLSI broth dilution guidelines using  
362 isosensitest broth and an inoculum of  $5 \times 10^5$  CFU/mL<sup>32</sup>. MIC values were determined as the lowest  
363 concentration of inhibitor to prevent visible cell growth after 18 hour incubation at 37°C.

### 364 Enzymatic Activity and Inhibition Assays

365 Enzyme activity was determined by monitoring the rate of NADPH oxidation following published  
366 methods<sup>10,13,14</sup>. Assays are performed at room temperature in a buffer solution 20 mM TES, pH  
367 7.5, 50 mM KCl, 0.5 mM EDTA, 10 mM beta-mercaptoethanol and 1mg/mL BSA. For enzymatic  
368 assays (500  $\mu$ L volume reactions), 1  $\mu$ g of protein is mixed with 100  $\mu$ M of NADPH and the  
369 reaction is activated with 100 $\mu$ M DHF (in 50 mM TES, pH 7.0). The reaction is monitored in a  
370 spectrophotometer at A<sub>340</sub>. The steady-state kinetic parameters of  $K_{M(DHF)}$  and  $K_{iDHF}$  were obtained  
371 for TMP<sup>R</sup> enzymes and compared to the wild type DHFR. Michaelis-Menten constants ( $K_M$   
372 and  $V_{max}$ ) were graphically determined for the substrate from the initial rates at various DHF  
373 concentration (1.6 to 100  $\mu$ M) and NADPH saturation (100  $\mu$ M), using a non-linear least-squares  
374 fitting procedure<sup>33</sup>. The turnover number ( $k_{cat}$ ) was calculated on the basis of the enzyme molecular  
375 mass.  $K_{iDHF}$  values were obtained using Cheng-Prusoff equation<sup>34</sup>. The reported data are averages  
376 of two independent experiments, where each experiment was conducted in triplicates.  
377 For enzyme inhibition experiments, 1  $\mu$ g of protein is mixed with 100 $\mu$ M of NADPH and varying  
378 concentrations of inhibitor for 5 minutes. After 5 minutes, the reaction is activated with 100 $\mu$ M  
379 DHF (in 50mM TES, pH 7.0) and monitored at A<sub>340</sub>. The IC<sub>50</sub> is defined as the concentration of  
380 compound required to reduce the activity of protein by 50%. For comparisons across Dfr species,  
381 the IC<sub>50</sub> values are converted to  $K_i$  to account for differing substrate affinities

### 382 HepG2 and MCF-10 Cytotoxicity

383 Adherent cell lines were maintained in Eagle's Minimal Essential Media with 2 mM glutamine  
384 and Earle's Balanced Salt Solution adjusted to contain 1.5 g/L sodium bicarbonate, 0.1 mM non-  
385 essential amino acids, 1 mM sodium pyruvate and 10 % fetal calf serum. Fetal calf serum used in  
386 these assays was lot matched throughout. All cultures were maintained under a humidified 5 %  
387 CO<sub>2</sub> atmosphere at 37 °C, had media refreshed twice weekly and were subcultured by

388 trypsinization and resuspension at a ratio of 1:5 each week. Toxicity assays were conducted  
389 between passages 10 – 20. Target compound toxicity was measured by incubating the test  
390 compound with the cells for four hours, washing the cells and finally treating the cells with  
391 Alamar Blue. After 12 – 24 hours the fluorescence of the reduced dye was measured.  
392 Fluorescence intensity as a function of test compound concentration was fit to the Fermi equation  
393 to estimate IC<sub>50</sub> values.

#### 394 Protein Preparation

395 Purification for all proteins in this study have been previously published<sup>10,13,14,35</sup>. In brief, proteins  
396 were expressed in BL21(DE3) E. coli cells with 1mM IPTG induction and 18 hour post induction  
397 growth at 18°C. Cells were lysed via sonication in a buffer of 25 mM Tris, pH 8.0, 0.4 M KCl  
398 supplemented with 0.1 mg/mL lysozyme, DNase, RNase and a cOmplete Mini Protease Inhibitor  
399 tablet. Enzymes were purified using Ni-NTA chromatography washing the bound protein with a  
400 solution of 25 mM Tris, pH 8.0 and 0.4 M KCl. Protein was eluted with 25mM Tris, pH 8.0, 0.3  
401 M KCl, 20% glycerol, 0.1 mM EDTA, 5 mM DTT and 250 mM imidazole. Elution fractions were  
402 run on SDS-PAGE gel and pure protein was pooled and desalted into a buffer of 25 mM Tris, pH  
403 8.0, 0.1 M KCl, 0.1 mM EDTA and 2 mM DTT and flashed frozen for storage at -80°C.

#### 404 Protein Crystallography

##### 405 *DfrB:NADPH:MTX*

406 DfrB at 13 mg/mL was incubated with 1 mM of MTX (in DMSO, Sigma Aldrich) and 2 mM of  
407 NADPH (in water, Sigma Aldrich) for several hours. The solution was pelleted at 4°C to remove  
408 any insoluble or precipitated protein. The protein was crystallized at 4°C in a 1:1 ratio in a solution  
409 of 0.1 M MES, pH 5.5, 0.2 M sodium acetate, 15% PEG 10,000 (Hampton Research) and 20%

410 gamma-butyrolactone (Sigma Aldrich) as an additive. Crystals generally grew within 7 days and  
411 were flash frozen in solution containing 25% glycerol.

412 *DfrB:NADPH:1232*

413 DfrB at 13mg/mL was incubated with 1mM of **1232** (in DMSO) and 2mM of NADPH (in water)  
414 for several hours. The solution was pelleted at 4°C to remove any insoluble or precipitated protein.  
415 The protein was crystallized at 4°C in a 1:1 ratio in a solution of 0.1 MES, pH 6.0, 0.1M sodium  
416 acetate, 15% PEG 10K and 20% gamma-butyrolactone as an additive. Crystals generally grew  
417 within 7 days and were flash frozen in solution containing 25% glycerol.

418 *DfrB:NADPH:1267*

419 DfrB at 13mg/mL was incubated with 1mM of **1267** (in DMSO) and 2mM of NADPH (in water)  
420 for several hours. The solution was pelleted at 4°C to remove any insoluble or precipitated protein.  
421 The protein was crystallized at 4°C in a 1:1 ratio in a solution of 0.1 MES, pH 6.0, 0.3M sodium  
422 acetate, 17% PEG 10,000 and 20% gamma-butyrolactone as an additive. Crystals generally grew  
423 within 7 days and were flash frozen in solution containing 25% glycerol.

424 All data were collected at Stanford Synchrotron Radiation Light (SSRL), SLAC National  
425 Accelerator Laboratory. Data were indexed using HKL2000. Phaser was used to identify  
426 molecular replacement solutions using PDB ID: 3F0Q<sup>35-38</sup>.

427 *DfrG:NADPH:1232* Homology Modelling

428 Homology modeling of DfrG active site was accomplished via the study of extant DHFR crystal  
429 structures in complex with various ligands. In this case, the *DfrB:NADPH:1232* crystal structure  
430 was selected as the input starting structure for the homology modeling of DfrG active sites. Next,  
431 an intermediate model was generated using a structure prediction calculation, termed “OSPNEY-  
432 designed sequence replacement” (ODSR) . This process involves mutation to the target sequence



433 implemented by side chain replacement. Here, all residues within 8Å of **1232** were selected and  
434 mutated to the appropriate DfrG amino acid, determined by sequence alignment to the sequence  
435 of DfrG. Sequence alignment was performed using CLUSTAL X 2.1 software<sup>39</sup>. Subsequently,  
436 side-chain replacement and global minimum energy conformation (GMEC) calculation were  
437 performed using OSPREY<sup>40,41</sup>. Following ODSR, the intermediate model was all-atom minimized  
438 using the SANDER package from the AMBER biomolecular simulation package<sup>42</sup>. Minimization  
439 was allowed to proceed for 1,000 steps, resulting in a fully-minimized homology model for DfrG  
440 active sites in complex with **1232** and NADPH. Scripts are available upon request for all steps in  
441 our protocol.

442

#### 443 **Ancillary Information**

##### 444 Supporting information

445 File S1: DfrG active site homology model with **1232** (PDB Format)

446 Figure S1: Sequence similarity comparison of DHFR enzymes used in this study

447 Figure S2: Sequence alignment of DHFR enzymes used in this study

448 Figure S3 DHFR expression in response to antifolate exposure

449 Figure S4: Overlay of **1191** and **1232** with active site amino acids

450 Figure S5: Overlay of folate and methotrexate in the DfrB active site

451 Figure S6: Minimum energy structures using biphenyl and propargylic dihedral drive

452 Table S1: DfrB and Human DHFR IC<sub>50</sub> Values used to Calculate Human Selectivity

453 Table S2: Crystallography Data Collection and Refinement Statistics

454 Table S3: Comparison of dihedral angles in minimum energy and bioactive conformations

455 Supplemental Biological and Synthetic Methods and Compound Characterization

456 Figures S7-S12: <sup>1</sup>H NMR Spectra of Novel Compounds

457 PDB Codes

458 DfrB:NADPH:1232 | **PDB ID: TBD**

459 DfrB:NADPH:1267 | **PDB ID: TBD**

460 DfrB:NADPH:Methotrexate | **PDB ID: TBD**

461 Corresponding author information

462 Dennis L. Wright: [Dennis.wright@uconn.edu](mailto:Dennis.wright@uconn.edu)

463 Present/ Current author addresses

464 SMR: Department of Chemical Biology and Therapeutics, St. Jude Children's Research

465 Hospital, Memphis, Tennessee, USA

466 YY: Microbiotix, Inc. Worcester, Massachusetts, USA

467 KV: MacDermid Ethone, Waterbury, Connecticut, USA

468 SS: Department of Genetics, Yale University, New Haven, Connecticut, USA

469 Acknowledgements

470 We acknowledge funding from the National Institutes of Health grants GM078031 and

471 GM078031 to BRD and AI111957 and AI104841 to DLW. We also acknowledge the SSRL

472 beamline staff for their assistance in remote data collection and crystallography support. Use of

473 the Stanford Synchrotron Radiation Lightsource, SLAC National Accelerator Laboratory, is

474 supported by the U.S. Department of Energy, Office of Science, Office of Basic Energy Sciences

475 under Contract No. DE-AC02-76SF00515.

476

477 Author contributions

478 SMR: Strain characterization and susceptibilities, enzyme inhibition, protein purification and  
479 protein crystallography. DS, YY and KV: synthesis and characterization of novel chemical  
480 matter. JK: protein purification and enzyme kinetic experiments. SW, GTH and MSF: DfrG  
481 homology models. SS: DHFR expression profiling. NDG and JBA: performed cytotoxicity  
482 assays. NDP: oversaw cytotoxicity experiments. AW: oversaw DHFR expression and western  
483 blotting experiments. BRD: oversaw computational experiments and DLW directed biology and  
484 synthetic chemistry. SMR, DJ, and DLW wrote and SMR, DJ, JK, DLW edited the manuscript.

485 Abbreviations used

486 IC<sub>50</sub>: concentration for 50% inhibitory activity, MIC: Minimum inhibitory concentrations,  
487 TMP<sup>R</sup>: Trimethoprim resistant, DHFR: dihydrofolate reductase

488 References

- 489 1. O’Neil, J. (2014) Antimicrobial Resistance: Tackling a crisis for the health and wealth of  
490 Nations. *Review on Antimicrobial Resistance*
- 491 2. Frieden, T. Antibiotic resistance threats. *Centers for Disease Control* 22–50 (2013).
- 492 3. Center for Disease Control and Prevention (2013) Outpatient antibiotic prescriptions —  
493 United States.
- 494 4. Schneider P, Hawser S, Islam K. 2003. Iclaprim, a novel diaminopyrimidine with potent  
495 activity on trimethoprim sensitive and resistant bacteria. *Bioorg. Med. Chem. Lett.* 13,  
496 4217–4221. DOI:10.1016/j.bmcl.2003.07.023
- 497 5. Dale GE, Broger C, Hartman PG, Langen H, Page MG, Then RL, Stüber D, (1995)  
498 Characterization of the gene for the chromosomal dihydrofolate reductase (DHFR) of  
499 *Staphylococcus epidermidis* ATCC 14990: The origin of the trimethoprim-resistant S1

- 500 DHFR from *Staphylococcus aureus*? *J. Bacteriology*, 17 2965-2970.  
501 DOI:0.1128/jb.177.11.2965-2970.1995
- 502 6. Vickers, A. A, Potter, N. J., Fishwick, C.W.G., Chopra, I., O'Neill, A. J. (2009) Analysis of  
503 mutational resistance to trimethoprim in *Staphylococcus aureus* by genetic and structural  
504 modelling techniques. *J. Antimicrob. Chemother.* 63, 1112-1117. DOI:10.1093/jac/dkp090
- 505 7. Nurjadi, D., Olalekan, A.O., Layer, F., Shittu, A.O., Alabi, A., Ghebremedhin, B.,  
506 Schaumburg, F., Hofmann-Eifler, J., Van Genderen, P.J., Caumes, E., Fleck, R.,  
507 Mockenhaupt, F.P., Herrmann, M., Kern, W. V., Abdulla, S., Grobusch, M.P., Kreamsner  
508 P.G., Wolz, C., Zanger, P. 2014. Emergence of trimethoprim resistance gene *dfpG* in  
509 *Staphylococcus aureus* causing human infection and colonization in sub-Saharan Africa  
510 and its import to Europe. *J. Antimicrob. Chemother.* 69, 2361–2368.  
511 DOI:10.1093/jac/dku174
- 512 8. Sekiguchi, J., Tharavichitkyl, P., Miyoshi-Akiyama, T., Vhupia, V., Fujino, T., Araake, M.,  
513 Irie, A., Morita, K., Kuratsuji, T., Kirikae, T. (2005) Cloning and Characterization of a  
514 Novel Trimethoprim-Resistant Dihydrofolate Reductase from a Nosocomial Isolate of  
515 *Staphylococcus aureus* CM.S2 (IMCJ1454). *Antimicrob. Agents Chemother.* 49, 3948-  
516 3951. DOI:10.1128/AAC.49.9.3948–3951.2005
- 517 9. Brennan, G.I., Abbott, Y., Burns, A., Leonard, F., McManus, B.A., O'Connell, B. (2016)  
518 The Emergence and Spread of Multiple Livestock-Associated Clonal Complex 398  
519 Methicillin-Resistant and Methicillin- Susceptible *Staphylococcus aureus* Strains among  
520 Animals and Humans in the Republic of Ireland, 2010–2014. *PLoS One* 11, e0149396.  
521 DOI:10.1371/journal.pone.0149396

- 522 10. Reeve, S.M., Scocchera, E.W., G-Dayananadan, N., Keshipeddy, S., Krucinska, J., Hajian,  
523 B., Ferreira, J., Nailor, M., Aeschlimann, J, Wright, D.L., Anderson, A.C. 2016. MRSA  
524 Isolates from United States Hospitals Carry *dfpG* and *dfpK* Resistance Genes and Succumb  
525 to Propargyl-Linked Antifolates. *Cell Chem. Biol.* 23, 1458-1467.  
526 DOI:10.1016/j.chembiol2016.11.007
- 527 11. Coelho, C., de Lencastre, H., Aires-de-Sousa, M. (2017) Frequent occurrence of  
528 trimethoprim-sulfamethoxazole hetero-resistant *Staphylococcus aureus* isolates in different  
529 African countries. *Eur. J. Clin. Microbiol. Infect. Dis.* 36, 1243-1252. DOI:  
530 10.1007/s10096-017-2915-x
- 531 12. Nurjadi, D., Schäfer, J., Friedrich-Jänicke, B., Mueller, A., Neumayr, A., Calvo-Cano, A.,  
532 Goorhuis, A., Nolhoek, N., Lagler, H., Kantele, A., Van Genderen, P.J.J., Gascon, J.,  
533 Grobusch, M.P., Caumes, E., Hatz, C., Fleck, R., Mochenhaupt, F.P., Zanger, P. (2015)  
534 Predominance of *dfpG* as determinant of trimethoprim resistance in imported  
535 *Staphylococcus aureus*. *Clin. Micro and Infection.* 21, 1095.re5-1095.e9. DOI:  
536 10.1016/j.cmi.2015.08.021
- 537 13. Keshipeddy, S., Reeve, S.M., Anderson, A.C., Wright, D.L. (2015) Nonracemic Antifolates  
538 Stereoselectively Recruit Alternate Cofactors and Overcome Resistance in *S. aureus* *J.*  
539 *Amer. Chem. Soc.* 137, 8983-8990. DOI:10.1021/jacs.5b01442f
- 540 14. Scocchera E, Reeve SM, Keshipeddy S, Lombardo MN, Hajian B, Sochia AE, Alverson  
541 JB, Priestley ND, Anderson AC, Wright DL. 2016. Charged Nonclassical Antifolates with  
542 Activity Against Gram-Positive and Gram-Negative Pathogens. *ACS Med. Chem. Lett.* 7,  
543 692-696. DOI: 10.1021/acsmchemlett.6b00120

- 544 15. Lamb, K., Lombardo, M.N., Alverson, J., Priestley, N., Wright, D., Anderson, A.C. (2014)  
545 Crystal structures of *Klebsiella pneumoniae* dihydrofolate reductase bound to propargyl-  
546 linked antifolates reveal features for potency and selectivity. *Antimicrob. Agents*  
547 *Chemother.* 58, 7484– 7491. DOI:10.1128/AAC.03555-14.
- 548 16. Lombardo MN, G-Dayananandan N, Wright DL, Anderson AC. 2016. Crystal Structures of  
549 Trimethoprim-Resistant DfrA1 Rationalize Potent Inhibition by Propargyl-Linked  
550 Antifolates. *ACS Infect Dis* acsinfecdis.5b00129.
- 551 17. Hajian, B., Scocchera, E., Keshipeddy, S., G-Dayananandan, N., Shoen, C., Krucinska, J.,  
552 Reeve, S., Cynamon, M., Anderson, A.C., Wright, D.L. (2016) Propargyl-linked antifolates  
553 are potent inhibitors of drug-sensitive and drug-resistant *mycobacterium tuberculosis*. *PLoS*  
554 *One* 11, 1–14. DOI: 10.1371/journal.pone.0161740
- 555 18. Reeve, S.M., Scocchera, E., Ferreira, J., G-Dayananandan, N., Keshipeddy, S., Wright, D.L.,  
556 Anderson, A.C. 2016. Charged Propargyl-linked Antifolates Reveal Mechanisms of  
557 Antifolate Resistance and Inhibit Trimethoprim-Resistant MRSA Strains Possessing  
558 Clinically Relevant Mutations. *J. Med. Chem.* 59, 6493-6500 DOI:  
559 10.1021/acs.jmedchem.6b00688
- 560 19. Heaslet, H., Harris, M., Fahnoe, K., Sarver, R., Putz, H., Chang, J., Subramanyam, C.,  
561 Barreiro, G., Miller, J.R. (2009) Structural comparison of chromosomal and exogenous  
562 dihydrofolate reductase from *Staphylococcus aureus* in complex with the potent inhibitor  
563 trimethoprim. *Proteins*, 76, 706-717. DOI: 0.1002/prot.22383
- 564 20. Pelphrey, P.M., Popov, V.M., Joska, T.M., Beierlein, J.M., Bolstad, E.S.D., Fillingham,  
565 Y.A., Wright, D.L., Anderson, A.C. (2007) Highly Efficient Ligands for Dihydrofolate

- 566 Reductase from *Cryptosporidium hominis* and *Toxoplasma gondii* Inspired by Structural  
567 Analysis. *J. Med. Chem.* 50, 940-950. DOI: 10.1021/jm061027h
- 568 21. Lewis, W.S., Cody, V., Galitsky, N., Luft, J.R., Pangborn, W., Chunduru, S.K., Spencer,  
569 H.T., Appleman, J.R., Blakely, R.L. (1995) Methotrexate resistant variants of Human  
570 Dihydrofolate Reductase with Substitutions of Leucine 22. Kinetics, crystallography, and  
571 potential of selectable markers. *J. Biol Chem*, 270, 5057-5064. DOI:  
572 0.1074/jbc.270.10.5057
- 573 22. Chan, D.C.M., Fu, H., Forsch, R.A., Queener, S.F., and Rosowsky, A. (2005) Design,  
574 Synthesis, and Antifolate Activity of New Analogues of Piritrexim and Other  
575 Diaminopyrimidine Dihydrofolate Reductase Inhibitors with  $\omega$ -Carboxyalkoxy or  $\omega$ -  
576 Carboxy-1-alkynyl Substitution in the Side Chain. *J. Med Chem.* 48, 4420-4431. DOI:  
577 10.1021/jm0581718
- 578 23. Assaraf, Y. G. (2007) Molecular basis of antifolate resistnace. *Cancer and Metastasis*  
579 *Reviews.* 26, 153–181. DOI: 10.1007/s10555-007-9049-z
- 580 24. Bastow, K. F., Prabhu, R., Cheng, Y.C. (1984) The Intracellular Content Of Dihydrofolate  
581 Reductase: Possibilities for Control and Implicationsfor Chemotherapy. *Adv. Enzyme*  
582 *Regul.* 22, 15-26. DOI:10.1016/0065-2571(84)90006-2
- 583 25. Hsieh, Y.C., Skacel, N. E., Bansal, N., Scotto, K. W., Banerjee, D., Bertino, J. R.,  
584 Abali, E. E. (2009) Species-Specific Differences in Translational Regulation of  
585 Dihydrofolate Reductase. *Molecular pharmacology*, 76, 723–733.  
586 DOI:10.1124/mol.109.055772
- 587 26. Skacel, N., Menon, L. G., Mishra, P. J., Peters, R., Banerjee, D., Bertino, J. R., Abali, E. E.  
588 (2005). Identification of amino acids required for the functional up-regulation of human

- 589 dihydrofolate reductase protein in response to antifolate treatment. *J.Biol. Chem.* 280,  
590 22721–22731. (2005). DOI: 10.1074/jbc.M500277200
- 591 27. Zhang, K., Rathod, P. K. (2002) Divergent regulation of dihydrofolate reductase between  
592 malaria parasite and human host. *Science*, 296, 545–547. DOI:10.1126/science.1068274
- 593 28. Shinde, C. G., Venkatesh, M. P., Kumar, T. M. P., Shivakumar, H. G. (2014) Methotrexate:  
594 A gold standard for treatment of rheumatoid arthritis. *J.Pain and Palliat. Care Pharmaco*,  
595 28, 351–358. DOI:10.3109/15360288.2014.959238
- 596 29. Yélamos, O., Puig, L. (2015) Systemic methotrexate for the treatment of psoriasis. *Expert*  
597 *Rev. Clin. Immun.* 11, 553–563. DOI: 10.1586/0411333X.2015.1026894
- 598 30. Gabbani, T., Deiana, S., Lunardi, S., Manetti, N., Annese, V. (2016) Safety profile of  
599 methotrexate in inflammatory bowel disease. *Expert Opin. Drug Saf.* 15, 1427–1437.  
600 DOI:10.1080/14740338.2016.1218468
- 601 31. Oefner, C., Bandera, M., Haldimann, A., Laue, H., Schulz, H., Mukhija, S., Parisi, S.,  
602 Weiss, L., Lociuro, S., Dale, G.E. (2009) Increased hydrophobic interactions of iclaprim  
603 with *Staphylococcus aureus* dihydrofolate reductase are responsible for the increase in  
604 affinity and antibacterial activity. *J. Antimicrob. Chemother.* 63, 687-698.  
605 DOI: 10.1093/jac/dkp024
- 606 32. National Committee for Clinical Laboratory Standards. 2014. CLSI Performance standard  
607 of Antimicrobial Susceptibility Testing: Twenty-fourth International Supplement. National  
608 Committee for Clinical Laboratory Standards, Wayne, PA.
- 609 33. Swift, M.L. (1997) GraphPad Prism, Data Analysis and Scientific Graphing. *J. Chem.*  
610 *Infor. Comput. Sci.* 37, 411-412. DOI:10.1021/ci960402j



- 611 34. Cheng, Y., Prusoff, W.H. (1973) Relationship between the inhibition constant (KI) and the  
612 concentration of inhibitor which cause 50 per cent inhibition (IC50) of an enzymatic  
613 reaction. *Biochem. Pharm.* 22, 2099-3108. DOI: 10.1016/0006-2952(73)90196-2.
- 614 35. Frey, K.M., Georgiev, I., Donald, B.R., Anderson, A.C. (2010) Predicting resistance using  
615 protein design algorithms. *Proc. Nat. Acad. Sci.* 107, 13707-13712. DOI:  
616 10.1073/pnas.1002162107
- 617 36. Otwinowski, Z. and Minor, W. (1997) Processing of X-ray Diffraction Data Collected in  
618 Oscillation Mode. *Methods in Enzymology*, 276, 307-326. DOI: 10.1016/S0076-  
619 6879(97)76066-X
- 620 37. McCoy, A.J., Grosse-Kunstleve, R.W., Adams, P.D., Winn, M.D. Storoni, L.C. Read, R.J.  
621 (2007) Phaser Crystallographic software. *J. Appl. Cryst.* 40, 658-674.  
622 DOI:10.1170/S0021889807021206
- 623 38. Adams, P.D., Afonine, P.V., Bunkóczi G., Chen, V.B., Davis, I.W., Echols, N., Headd,  
624 J.J., Hung, L.-W., Kapral, G.J., Grosse-Kunstleve, R.W., McCoy, A.J., Moriarty, N.W.,  
625 Oeffner, R., Read, R.J., Richardson, D.C., Richardson, T.C., Terwilliger, T.C., Zwart, P.H.  
626 (2010) PHENIX: a comprehensive python-based system for macromolecular structure  
627 solution. *Acta Cryst*, D66, 213-221. DOI:10.1107/S0907444909052925
- 628 39. Larkin, M.A., Blackshields, G., Brown, N.P., Chenna, R., McGettigan, P.A., McWilliam,  
629 H., Valentin, F., Wallace, I.M., Wilm, A., Lopez, R., Thompson, T.J., Higgins, D.G. (2007)  
630 Clustal W and Clustal X version 2.0. *Bioinformatics* 23, 2947-2948. DOI:  
631 10.1093/bioinformatics/btm404
- 632 40. Gainza, P., Roberts, K.E., Georgiev, I., Lilien, R.H., Keedy, D.A., Chen, C., Reza, F.,  
633 Anderson, A.C., Richardson, D.C., Richardson, J.S., Donald, B.R. (2013) OSPREY:

- 634 Protein Design with Ensembles, Flexibility and Provable Algorithms. *Methods Enzymol.*  
635 523. 27-107. DOI: 10.1016/B978-0-12-394292-0.00005-9
- 636 41. Hallen, M.A., Martin, J.W., Ojewole, A., Jou, J.D., Lowegard, A.U., Frenkel, M.S.,  
637 Gainza, P., Nisonoff, H.M., Mukund, A., Wang, S., Holt, G.T., Zhou, D., Dowd, E.,  
638 Donald, B.R. (2018) OSPREY 3.0: open-Source Protein Redesign for You, with Powerful  
639 New Tools. *J. Comp. Chem.* 39, 2494-2507. DOI: 10.1002/jcc.25522
- 640 42. Pearlman, D.A., Case, D.A., Caldwell, J.W., Ross, W. S., Cheatham, T.E., DeBolt, S.,  
641 Ferguson, D., Seibel, G., Kollman, P. (1995) AMBER, a package of computer programs for  
642 applying molecular mechanics, normal mode analysis, molecular dynamics and free energy  
643 calculations to simulate the structural and energetic properties of molecules. *Comp. Phys.*  
644 *Comm.* 91, 1-41. DOI: 10.1016/0020-4655(95)00041-D
- 645
